# Supplementary material for: What matters when managing childhood fever in the emergency department? A discrete-choice experiment comparing the preferences of parents and healthcare professionals in the UK
Source: PubMed Central journal article supplement (PMC7392496; doi:10.1136/archdischild-2019-318209), 2020-02-27
Supplement: archdischild-2019-318209supp001.pdf [file archdischild-2019-318209supp001.pdf]

## 1 Supplementary Table 1: Results of coin-ranking exercise

| All                                                              | Total | Mean | Median | Max | Min |
|------------------------------------------------------------------|-------|------|--------|-----|-----|
| Reducing the amount of time waiting for updates about your child | 616   | 26.8 | 25     | 75  | 0   |
| Spending less time in A&E                                        | 393   | 17.1 | 20     | 48  | 0   |
| Having lots of tests to rule out different causes                | 322   | 14.0 | 12     | 40  | 0   |
| Being seen by a more experienced doctor                          | 314   | 13.7 | 10     | 42  | 0   |
| Minimising pain/discomfort due to tests                          | 300   | 13.0 | 12     | 32  | 0   |
| Not having to stay overnight in the hospital                     | 149   | 6.5  | 0      | 25  | 0   |
| Being given antibiotics                                          | 119   | 5.2  | 5      | 20  | 0   |

2

3

4

5

6
