# Supplementary material for: What matters when managing childhood fever in the emergency department? A discrete-choice experiment comparing the preferences of parents and healthcare professionals in the UK
Source: PubMed Central journal article supplement (PMC7392496; doi:10.1136/archdischild-2019-318209), 2020-02-27
Supplement: archdischild-2019-318209supp002.pdf [file archdischild-2019-318209supp002.pdf]

| Question 1/16                            | OPTION A                                                                                                         | OPTION B                                                                                                             |
|------------------------------------------|------------------------------------------------------------------------------------------------------------------|----------------------------------------------------------------------------------------------------------------------|
| TREATING YOUR CHILD                      |  <p>CONSULTANT</p>              |  <p>CONSULTANT</p>                |
| PAIN OR DISCOMFORT FROM TESTS            |  <p>LOW</p>                     |  <p>MODERATE</p>                  |
| CHANCE OF GETTING ANTIBIOTICS            |  <p>LOW</p>                    |  <p>LOW</p>                      |
| PERSONAL COST TO YOU                     |  <p>£7</p>                    |  <p>£20</p>                     |
| TOTAL TIME SPENT IN EMERGENCY DEPARTMENT |  <p>1 HOUR</p>                |  <p>4 HOURS</p>                 |
| RECEIVE A QUICK TEST DURING TRIAGE?      |                               |                                 |
| I CHOOSE ...                             | <input data-bbox="769 1850 842 1917" type="checkbox"/><br><input data-bbox="769 1921 858 2002" type="checkbox"/> | <input data-bbox="1171 1850 1244 1917" type="checkbox"/><br><input data-bbox="1219 1921 1305 2002" type="checkbox"/> |

| Question 2/16                            | OPTION A                                                                                                         | OPTION B                                                                                                             |
|------------------------------------------|------------------------------------------------------------------------------------------------------------------|----------------------------------------------------------------------------------------------------------------------|
| TREATING YOUR CHILD                      |  <p>CONSULTANT</p>              |  <p>JUNIOR DOCTOR</p>             |
| PAIN OR DISCOMFORT FROM TESTS            |  <p>MODERATE</p>                |  <p>LOW</p>                       |
| CHANCE OF GETTING ANTIBIOTICS            |  <p>LOW</p>                    |  <p>HIGH</p>                     |
| PERSONAL COST TO YOU                     |  <p>£20</p>                   |  <p>£7</p>                      |
| TOTAL TIME SPENT IN EMERGENCY DEPARTMENT |  <p>2 HOURS</p>               |  <p>3 HOURS</p>                 |
| RECEIVE A QUICK TEST DURING TRIAGE?      |                               |                                 |
| I CHOOSE ...                             | <input data-bbox="767 1854 847 1921" type="checkbox"/><br><input data-bbox="767 1921 855 2007" type="checkbox"/> | <input data-bbox="1169 1854 1249 1921" type="checkbox"/><br><input data-bbox="1217 1921 1302 2007" type="checkbox"/> |

| Question 3/16                            | OPTION A                                                                                                         | OPTION B                                                                                                             |
|------------------------------------------|------------------------------------------------------------------------------------------------------------------|----------------------------------------------------------------------------------------------------------------------|
| TREATING YOUR CHILD                      | <br><b>CONSULTANT</b>           | <br><b>NURSE PRACTITIONER</b>     |
| PAIN OR DISCOMFORT FROM TESTS            | <br><b>LOW</b>                  | <br><b>MODERATE</b>               |
| CHANCE OF GETTING ANTIBIOTICS            | <br><b>HIGH</b>                | <br><b>LOW</b>                   |
| PERSONAL COST TO YOU                     | <br><b>£7</b>                 | <br><b>£20</b>                  |
| TOTAL TIME SPENT IN EMERGENCY DEPARTMENT | <br><b>4 HOURS</b>            | <br><b>1 HOUR</b>               |
| RECEIVE A QUICK TEST DURING TRIAGE?      |                               |                                 |
| I CHOOSE ...                             | <input data-bbox="769 1850 845 1921" type="checkbox"/><br><input data-bbox="769 1921 858 2007" type="checkbox"/> | <input data-bbox="1171 1850 1248 1921" type="checkbox"/><br><input data-bbox="1219 1921 1308 2007" type="checkbox"/> |

| Question 4/16                            | OPTION A                                                                                                         | OPTION B                                                                                                             |
|------------------------------------------|------------------------------------------------------------------------------------------------------------------|----------------------------------------------------------------------------------------------------------------------|
| TREATING YOUR CHILD                      |  <p>NURSE PRACTITIONER</p>      |  <p>JUNIOR DOCTOR</p>             |
| PAIN OR DISCOMFORT FROM TESTS            |  <p>LOW</p>                     |  <p>MODERATE</p>                  |
| CHANCE OF GETTING ANTIBIOTICS            |  <p>HIGH</p>                   |  <p>LOW</p>                      |
| PERSONAL COST TO YOU                     |  <p>£7</p>                    |  <p>£20</p>                     |
| TOTAL TIME SPENT IN EMERGENCY DEPARTMENT |  <p>2 HOURS</p>               |  <p>3 HOURS</p>                 |
| RECEIVE A QUICK TEST DURING TRIAGE?      |                               |                                 |
| I CHOOSE ...                             | <input data-bbox="767 1850 847 1921" type="checkbox"/><br><input data-bbox="767 1921 858 2007" type="checkbox"/> | <input data-bbox="1171 1850 1251 1921" type="checkbox"/><br><input data-bbox="1222 1921 1305 2007" type="checkbox"/> |

| Question 5/16                            | OPTION A                                                                                                         | OPTION B                                                                                                             |
|------------------------------------------|------------------------------------------------------------------------------------------------------------------|----------------------------------------------------------------------------------------------------------------------|
| TREATING YOUR CHILD                      |  <p>NURSE PRACTITIONER</p>      |  <p>JUNIOR DOCTOR</p>             |
| PAIN OR DISCOMFORT FROM TESTS            |  <p>MODERATE</p>                |  <p>LOW</p>                       |
| CHANCE OF GETTING ANTIBIOTICS            |  <p>LOW</p>                    |  <p>HIGH</p>                     |
| PERSONAL COST TO YOU                     |  <p>£7</p>                    |  <p>£20</p>                     |
| TOTAL TIME SPENT IN EMERGENCY DEPARTMENT |  <p>4 HOURS</p>               |  <p>1 HOUR</p>                  |
| RECEIVE A QUICK TEST DURING TRIAGE?      |                               |                                 |
| I CHOOSE ...                             | <input data-bbox="767 1850 847 1917" type="checkbox"/><br><input data-bbox="767 1917 858 2007" type="checkbox"/> | <input data-bbox="1171 1850 1251 1917" type="checkbox"/><br><input data-bbox="1219 1917 1305 2007" type="checkbox"/> |

| Question 6/16                            | OPTION A                                                                                                         | OPTION B                                                                                                             |
|------------------------------------------|------------------------------------------------------------------------------------------------------------------|----------------------------------------------------------------------------------------------------------------------|
| TREATING YOUR CHILD                      |  <p>NURSE PRACTITIONER</p>      |  <p>JUNIOR DOCTOR</p>             |
| PAIN OR DISCOMFORT FROM TESTS            |  <p>LOW</p>                     |  <p>MODERATE</p>                  |
| CHANCE OF GETTING ANTIBIOTICS            |  <p>LOW</p>                    |  <p>HIGH</p>                     |
| PERSONAL COST TO YOU                     |  <p>£12</p>                   |  <p>£12</p>                     |
| TOTAL TIME SPENT IN EMERGENCY DEPARTMENT |  <p>1 HOUR</p>                |  <p>4 HOURS</p>                 |
| RECEIVE A QUICK TEST DURING TRIAGE?      |                               |                                 |
| I CHOOSE ...                             | <input data-bbox="767 1850 842 1921" type="checkbox"/><br><input data-bbox="772 1921 858 2007" type="checkbox"/> | <input data-bbox="1171 1850 1246 1921" type="checkbox"/><br><input data-bbox="1219 1921 1305 2007" type="checkbox"/> |

| Question 7/16                            | OPTION A                                                                                                         | OPTION B                                                                                                             |
|------------------------------------------|------------------------------------------------------------------------------------------------------------------|----------------------------------------------------------------------------------------------------------------------|
| TREATING YOUR CHILD                      | <br><b>JUNIOR DOCTOR</b>        | <br><b>CONSULTANT</b>             |
| PAIN OR DISCOMFORT FROM TESTS            | <br><b>LOW</b>                  | <br><b>MODERATE</b>               |
| CHANCE OF GETTING ANTIBIOTICS            | <br><b>MIDDLE</b>              | <br><b>MIDDLE</b>                |
| PERSONAL COST TO YOU                     | <br><b>£20</b>                | <br><b>£7</b>                   |
| TOTAL TIME SPENT IN EMERGENCY DEPARTMENT | <br><b>3 HOURS</b>            | <br><b>2 HOURS</b>              |
| RECEIVE QUICK TEST DURING TRIAGE?        |                               |                                 |
| I CHOOSE ...                             | <input data-bbox="769 1854 842 1921" type="checkbox"/><br><input data-bbox="769 1921 855 2007" type="checkbox"/> | <input data-bbox="1171 1854 1244 1921" type="checkbox"/><br><input data-bbox="1219 1921 1305 2007" type="checkbox"/> |



| Question 8/16                            | OPTION A                                                                                                         | OPTION B                                                                                                             |
|------------------------------------------|------------------------------------------------------------------------------------------------------------------|----------------------------------------------------------------------------------------------------------------------|
| TREATING YOUR CHILD                      |  <p>CONSULTANT</p>              |  <p>NURSE PRACTITIONER</p>        |
| PAIN OR DISCOMFORT FROM TESTS            |  <p>MODERATE</p>                |  <p>LOW</p>                       |
| CHANCE OF GETTING ANTIBIOTICS            |  <p>MIDDLE</p>                 |  <p>MIDDLE</p>                   |
| PERSONAL COST TO YOU                     |  <p>£7</p>                    |  <p>£20</p>                     |
| TOTAL TIME SPENT IN EMERGENCY DEPARTMENT |  <p>4 HOURS</p>               |  <p>1 HOUR</p>                  |
| RECEIVE A QUICK TEST DURING TRIAGE?      |                               |                                 |
| I CHOOSE ...                             | <input data-bbox="767 1850 847 1921" type="checkbox"/><br><input data-bbox="767 1921 858 2002" type="checkbox"/> | <input data-bbox="1169 1850 1249 1921" type="checkbox"/><br><input data-bbox="1217 1921 1308 2002" type="checkbox"/> |



| Question 9/16                            | OPTION A                                                                                                  | OPTION B                                                                                                         |
|------------------------------------------|-----------------------------------------------------------------------------------------------------------|------------------------------------------------------------------------------------------------------------------|
| TREATING YOUR CHILD                      | <br><b>JUNIOR DOCTOR</b> | <br><b>NURSE PRACTITIONER</b> |
| PAIN OR DISCOMFORT FROM TESTS            | <br><b>MODERATE</b>      | <br><b>LOW</b>                |
| CHANCE OF GETTING ANTIBIOTICS            | <br><b>MIDDLE</b>       | <br><b>MIDDLE</b>            |
| PERSONAL COST TO YOU                     | <br><b>£20</b>         | <br><b>£7</b>               |
| TOTAL TIME SPENT IN EMERGENCY DEPARTMENT | <br><b>2 HOURS</b>     | <br><b>3 HOURS</b>          |
| RECEIVE A QUICK TEST DURING TRIAGE?      |                        |                             |
| I CHOOSE ...                             | <input type="checkbox"/><br><input type="checkbox"/>                                                      | <input type="checkbox"/><br><input type="checkbox"/>                                                             |

| Question 10/16                           | OPTION A                                                                                                         | OPTION B                                                                                                             |
|------------------------------------------|------------------------------------------------------------------------------------------------------------------|----------------------------------------------------------------------------------------------------------------------|
| TREATING YOUR CHILD                      |  <p>CONSULTANT</p>              |  <p>JUNIOR DOCTOR</p>             |
| PAIN OR DISCOMFORT FROM TESTS            |  <p>MODERATE</p>                |  <p>LOW</p>                       |
| CHANCE OF GETTING ANTIBIOTICS            |  <p>MIDDLE</p>                 |  <p>MIDDLE</p>                   |
| PERSONAL COST TO YOU                     |  <p>£20</p>                   |  <p>£7</p>                      |
| TOTAL TIME SPENT IN EMERGENCY DEPARTMENT |  <p>2 HOURS</p>               |  <p>3 HOURS</p>                 |
| RECEIVE A QUICK TEST DURING TRIAGE?      |                               |                                 |
| I CHOOSE ...                             | <input data-bbox="770 1854 850 1921" type="checkbox"/><br><input data-bbox="770 1921 850 2004" type="checkbox"/> | <input data-bbox="1169 1854 1249 1921" type="checkbox"/><br><input data-bbox="1225 1921 1305 2004" type="checkbox"/> |

| Question 11/16                           | OPTION A                                                                                                         | OPTION B                                                                                                             |
|------------------------------------------|------------------------------------------------------------------------------------------------------------------|----------------------------------------------------------------------------------------------------------------------|
| TREATING YOUR CHILD                      |  <p>CONSULTANT</p>              |  <p>NURSE PRACTITIONER</p>        |
| PAIN OR DISCOMFORT FROM TESTS            |  <p>LOW</p>                     |  <p>MODERATE</p>                  |
| CHANCE OF GETTING ANTIBIOTICS            |  <p>HIGH</p>                   |  <p>LOW</p>                      |
| PERSONAL COST TO YOU                     |  <p>£7</p>                    |  <p>£12</p>                     |
| TOTAL TIME SPENT IN EMERGENCY DEPARTMENT |  <p>3 HOURS</p>               |  <p>2 HOURS</p>                 |
| RECEIVE A QUICK TEST DURING TRIAGE?      |                               |                                 |
| I CHOOSE ...                             | <input data-bbox="767 1854 847 1921" type="checkbox"/><br><input data-bbox="767 1921 858 2002" type="checkbox"/> | <input data-bbox="1171 1854 1251 1921" type="checkbox"/><br><input data-bbox="1219 1921 1305 2002" type="checkbox"/> |

Question 12/16

|                                          | OPTION A                                                                                        | OPTION B                                                                                                  |
|------------------------------------------|-------------------------------------------------------------------------------------------------|-----------------------------------------------------------------------------------------------------------|
| TREATING YOUR CHILD                      | <br>CONSULTANT | <br>NURSE PRACTITIONER |
| PAIN OR DISCOMFORT FROM TESTS            | <br>LOW        | <br>MODERATE           |
| CHANCE OF GETTING ANTIBIOTICS            | <br>LOW       | <br>MIDDLE            |
| PERSONAL COST TO YOU                     | <br>£12      | <br>£12              |
| TOTAL TIME SPENT IN EMERGENCY DEPARTMENT | <br>1 HOUR   | <br>4 HOURS          |
| RECEIVE A QUICK TEST DURING TRIAGE?      |              |                      |
| I CHOOSE ...                             | <input type="checkbox"/><br><input type="checkbox"/>                                            | <input type="checkbox"/><br><input type="checkbox"/>                                                      |

| Question 13/16                           | OPTION A                                                                                                         | OPTION B                                                                                                             |
|------------------------------------------|------------------------------------------------------------------------------------------------------------------|----------------------------------------------------------------------------------------------------------------------|
| TREATING YOUR CHILD                      | <br><b>JUNIOR DOCTOR</b>        | <br><b>NURSE PRACTITIONER</b>     |
| PAIN OR DISCOMFORT FROM TESTS            | <br><b>MODERATE</b>             | <br><b>LOW</b>                    |
| CHANCE OF GETTING ANTIBIOTICS            | <br><b>HIGH</b>                | <br><b>LOW</b>                   |
| PERSONAL COST TO YOU                     | <br><b>£20</b>                | <br><b>£7</b>                   |
| TOTAL TIME SPENT IN EMERGENCY DEPARTMENT | <br><b>1 HOUR</b>             | <br><b>4 HOURS</b>              |
| RECEIVE A QUICK TEST DURING TRIAGE?      |                               |                                 |
| I CHOOSE ...                             | <input data-bbox="767 1850 842 1921" type="checkbox"/><br><input data-bbox="767 1921 858 2007" type="checkbox"/> | <input data-bbox="1171 1850 1246 1921" type="checkbox"/><br><input data-bbox="1219 1921 1305 2007" type="checkbox"/> |

| Question 14/16                           | OPTION A                                                                                               | OPTION B                                                                                                    |
|------------------------------------------|--------------------------------------------------------------------------------------------------------|-------------------------------------------------------------------------------------------------------------|
| TREATING YOUR CHILD                      | <br><b>CONSULTANT</b> | <br><b>JUNIOR DOCTOR</b> |
| PAIN OR DISCOMFORT FROM TESTS            | <br><b>MODERATE</b>   | <br><b>LOW</b>           |
| CHANCE OF GETTING ANTIBIOTICS            | <br><b>HIGH</b>      | <br><b>LOW</b>          |
| PERSONAL COST TO YOU                     | <br><b>£7</b>       | <br><b>£20</b>         |
| TOTAL TIME SPENT IN EMERGENCY DEPARTMENT | <br><b>2 HOURS</b>  | <br><b>3 HOURS</b>     |
| RECEIVE A QUICK TEST DURING TRIAGE?      |                     |                        |
| I CHOOSE ...                             | <input type="checkbox"/><br><input type="checkbox"/>                                                   | <input type="checkbox"/><br><input type="checkbox"/>                                                        |

| Question 15/16                           | OPTION A                                                                                                         | OPTION B                                                                                                             |
|------------------------------------------|------------------------------------------------------------------------------------------------------------------|----------------------------------------------------------------------------------------------------------------------|
| TREATING YOUR CHILD                      |  <p>JUNIOR DOCTOR</p>           |  <p>CONSULTANT</p>                |
| PAIN OR DISCOMFORT FROM TESTS            |  <p>LOW</p>                     |  <p>MODERATE</p>                  |
| CHANCE OF GETTING ANTIBIOTICS            |  <p>LOW</p>                    |  <p>HIGH</p>                     |
| PERSONAL COST TO YOU                     |  <p>£12</p>                   |  <p>£12</p>                     |
| TOTAL TIME SPENT IN EMERGENCY DEPARTMENT |  <p>4 HOURS</p>               |  <p>1 HOUR</p>                  |
| RECEIVE A QUICK TEST DURING TRIAGE?      |                               |                                 |
| I CHOOSE ...                             | <input data-bbox="767 1850 842 1921" type="checkbox"/><br><input data-bbox="772 1921 855 2002" type="checkbox"/> | <input data-bbox="1169 1850 1244 1921" type="checkbox"/><br><input data-bbox="1219 1921 1302 2002" type="checkbox"/> |



| Question 16/16                           | OPTION A                                                                                                         | OPTION B                                                                                                             |
|------------------------------------------|------------------------------------------------------------------------------------------------------------------|----------------------------------------------------------------------------------------------------------------------|
| TREATING YOUR CHILD                      | <br>JUNIOR DOCTOR               | <br>JUNIOR DOCTOR                 |
| PAIN OR DISCOMFORT FROM TESTS            | <br>LOW                         | <br>MODERATE                      |
| CHANCE OF GETTING ANTIBIOTICS            | <br>LOW                        | <br>LOW                          |
| PERSONAL COST TO YOU                     | <br>£7                        | <br>£20                         |
| TOTAL TIME SPENT IN EMERGENCY DEPARTMENT | <br>1 HOUR                    | <br>4 HOURS                     |
| RECEIVE A QUICK TEST DURING TRIAGE?      |                               |                                 |
| I CHOOSE ...                             | <input data-bbox="767 1854 847 1921" type="checkbox"/><br><input data-bbox="767 1921 858 2011" type="checkbox"/> | <input data-bbox="1169 1854 1249 1921" type="checkbox"/><br><input data-bbox="1217 1921 1305 2011" type="checkbox"/> |
