# Supplementary figures and images for: What matters when managing childhood fever in the emergency department? A discrete-choice experiment comparing the preferences of parents and healthcare professionals in the UK
Source: HighWire-hosted journal article supplement (doi:10.1136/archdischild-2019-318209), 2020-02-27

Supplementary Figure 2: Flow diagram of study stages

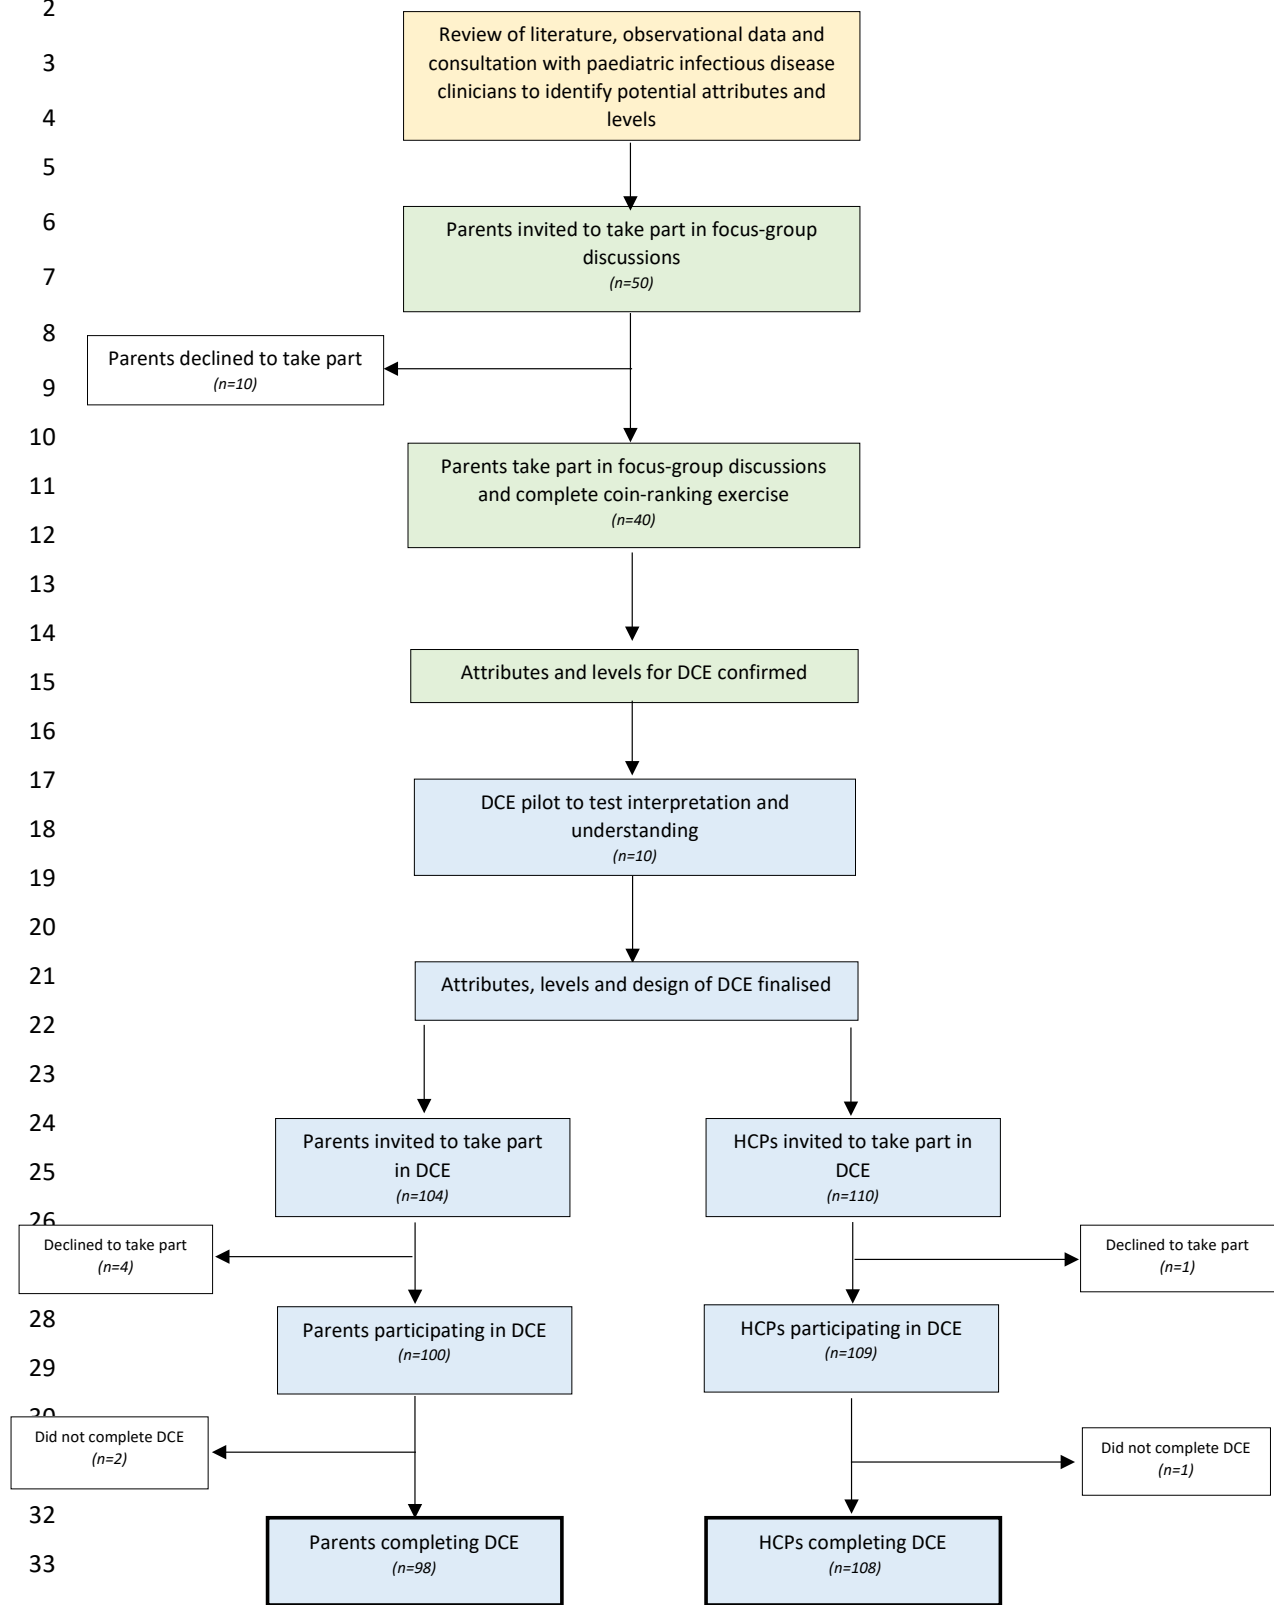

Supplement: archdischild-2019-318209supp004_data_supplement.pdf [file archdischild-2019-318209supp004_data_supplement.pdf]

Supplementary Figure 2: Flow diagram of study stages

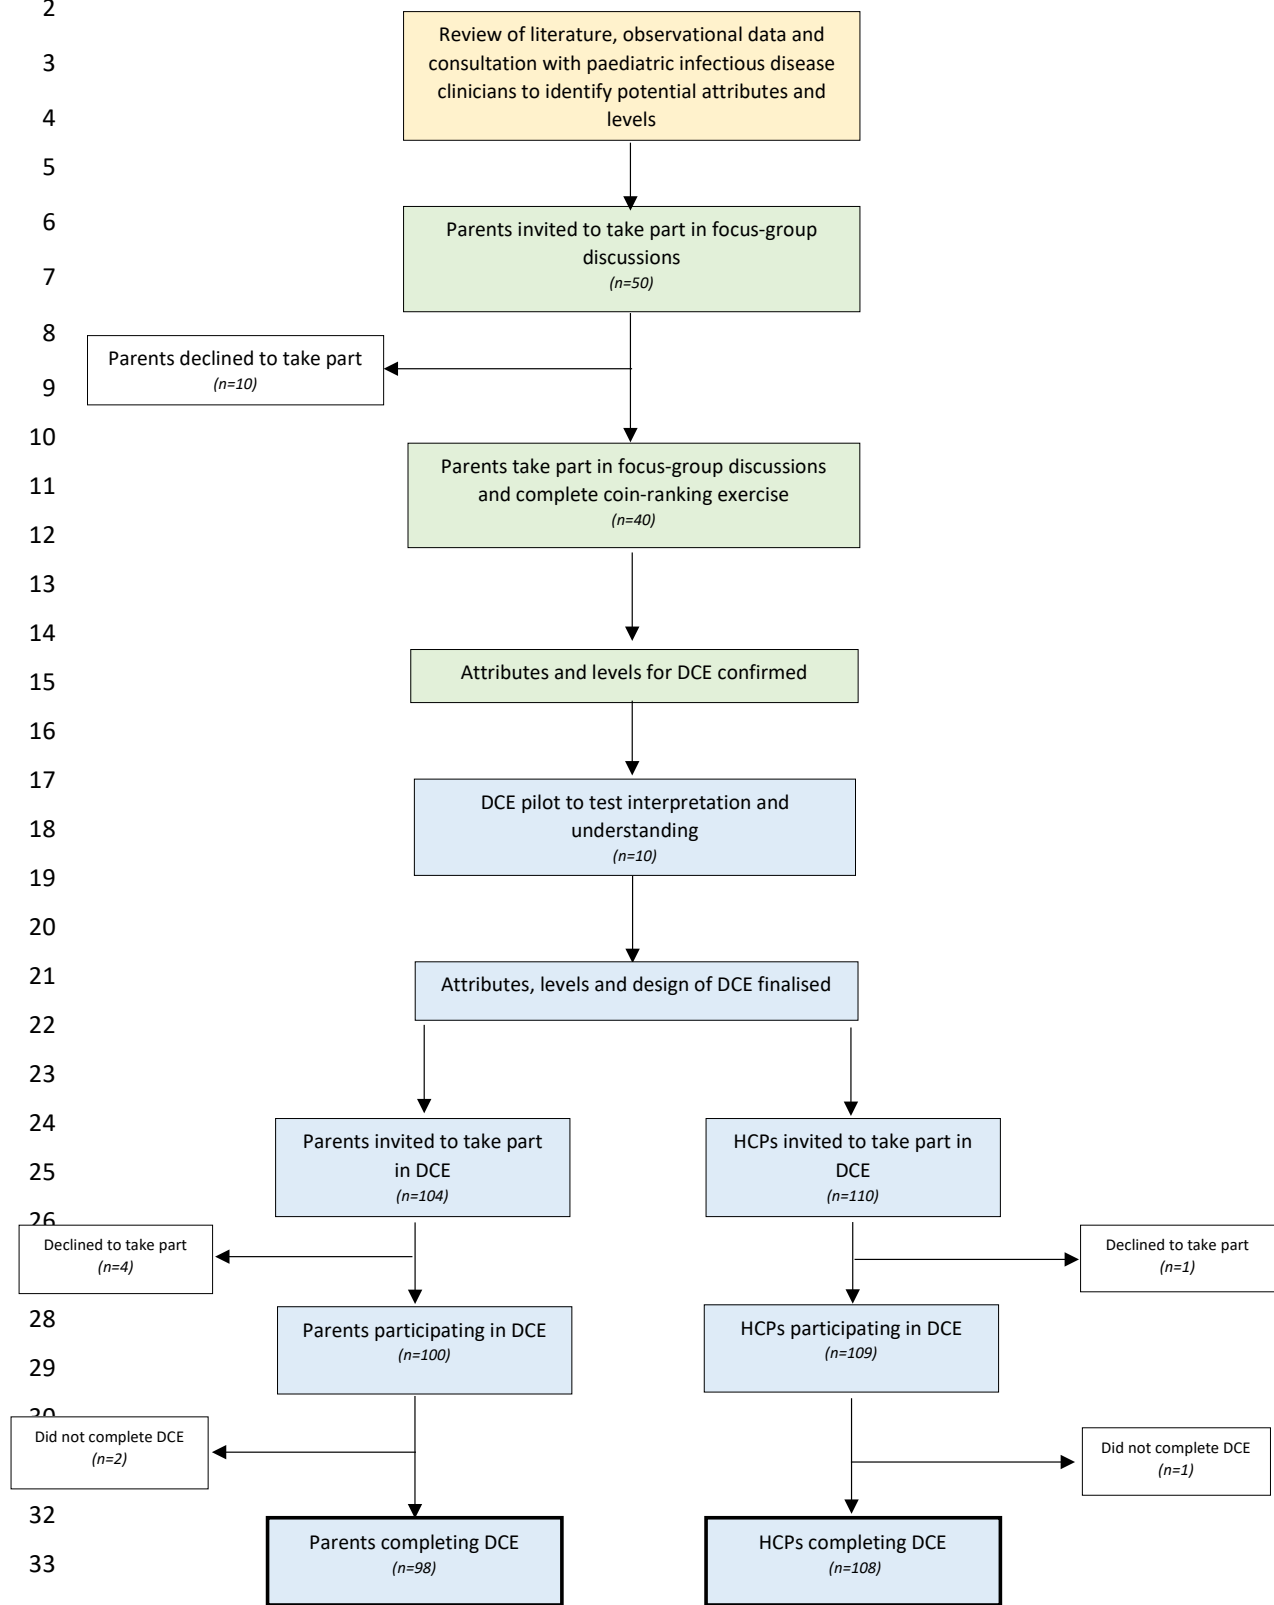

Supplement: archdischild-2019-318209supp004_data_supplement.pdf [file archdischild-2019-318209supp004_data_supplement.pdf]
